# Supplementary material
Source: Royal Society of Chemistry journal article supplement (doi:10.1039/d6ja00078a)
Supplement: d6ja00078a2.pdf [file d6ja00078a2.pdf]

Supplementary Information:

Characterization of the central channel and its flow  
velocity distribution in an analytical Inductively-  
Coupled-Plasma source

Xiaobao Mao <sup>1</sup>, Yongyang Su <sup>2,\*</sup>, Zhiming Li <sup>2</sup>, Xin Han <sup>1</sup>, Jiang Xu <sup>2</sup>,

Wei Wang <sup>2</sup>, Ruiyang Xi <sup>2</sup>, Pengfei Zhang <sup>2</sup>, Xiaofei Lan <sup>1,\*</sup>

1 School of Physics and Astronomy, China West Normal University,  
Nanchong, Sichuan, 637002, China

2 Northwest Institute of Nuclear Technology, P.O. Box 69-14, Xi'an,  
Shaanxi, 710024, China

\* Corresponding author

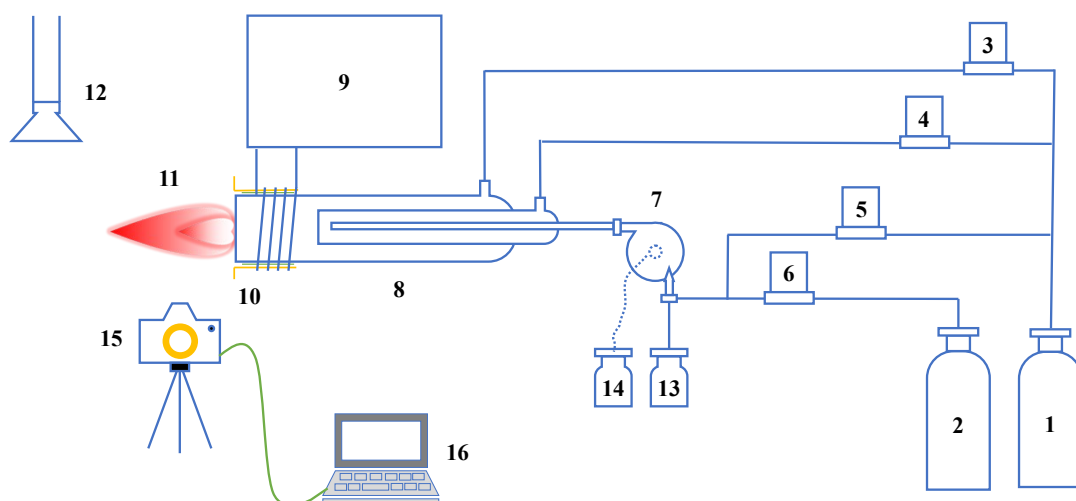

Figure S1 Schematic diagram of the facility. 1 argon gas cylinder, 2 molecular gas cylinder, 3 mass flow controller (MFC) for coolant gas, 4 MFC for auxiliary gas, 5 MFC for sample gas, 6 MFC for added gas, 7 nebulizer and cyclone chamber, 8 quartz torch, 9 r.f. power generator and impedance matching network, 10 shielded plate and bonnet, 11 plasma, 12 exhaust pipe, 13 suspension sample, 14 waste, 15 high-speed colour camera, 16 computer.

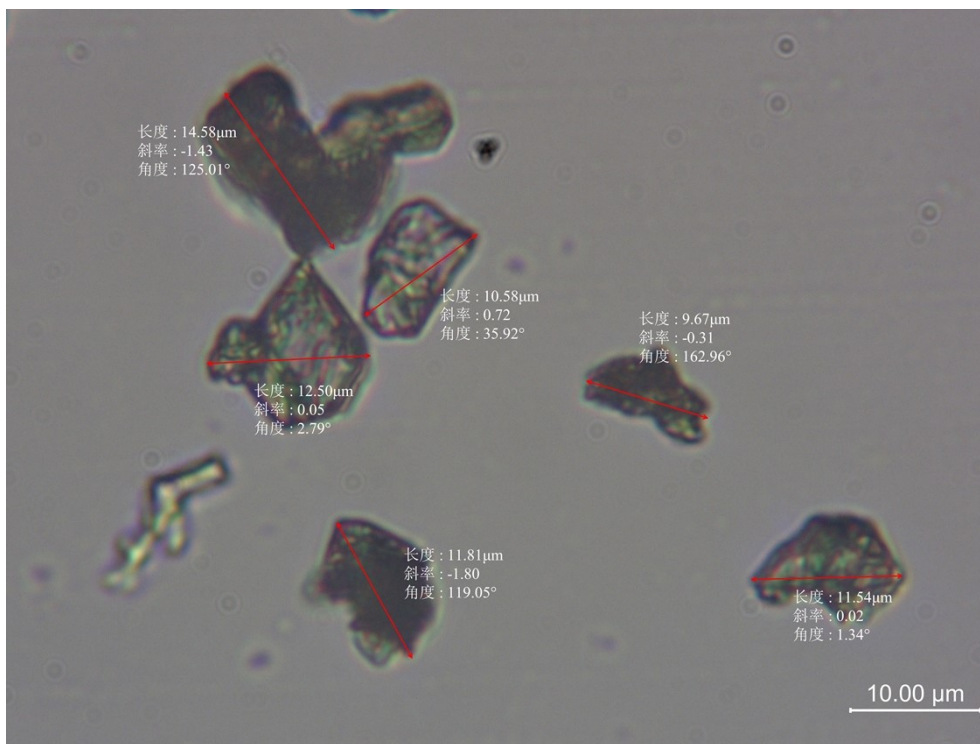

(a)

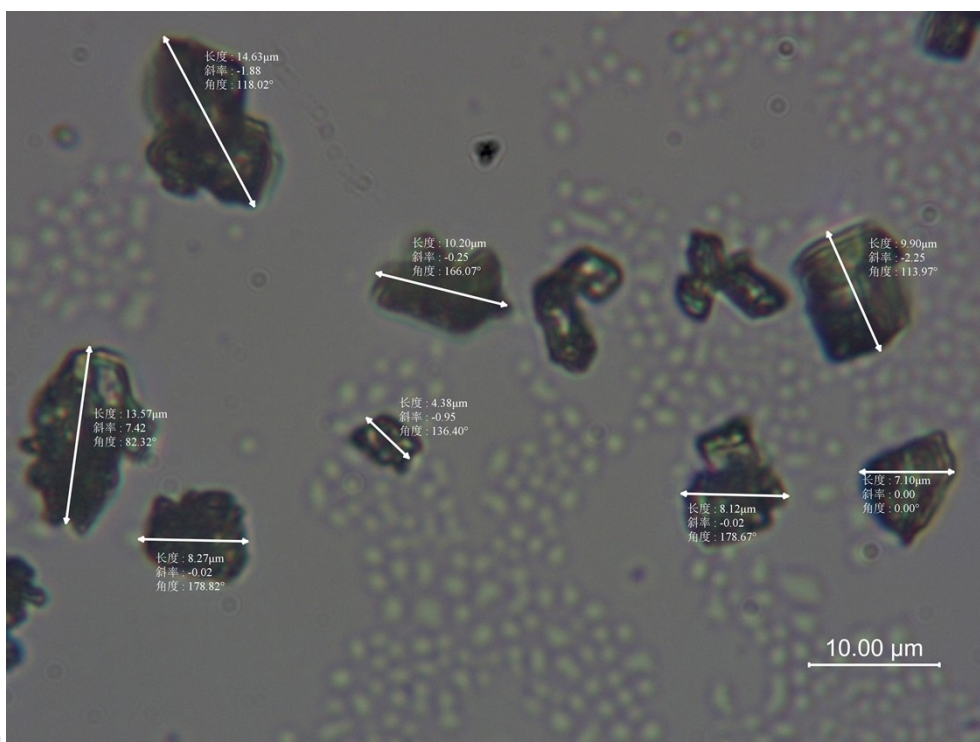

(b)

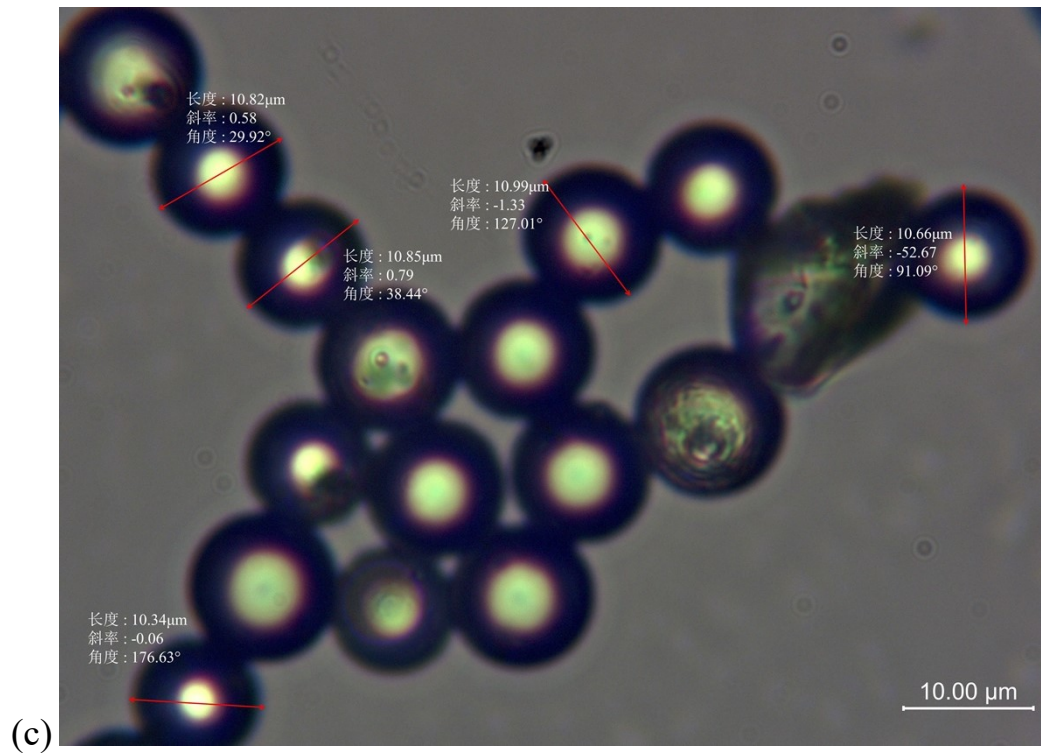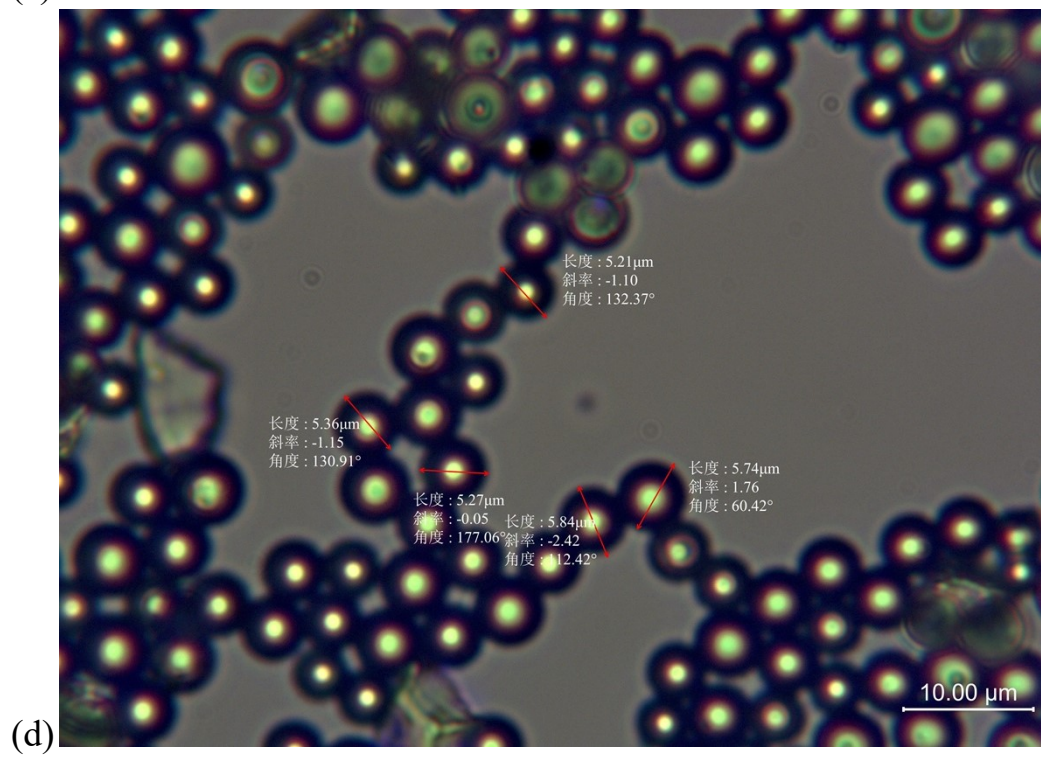

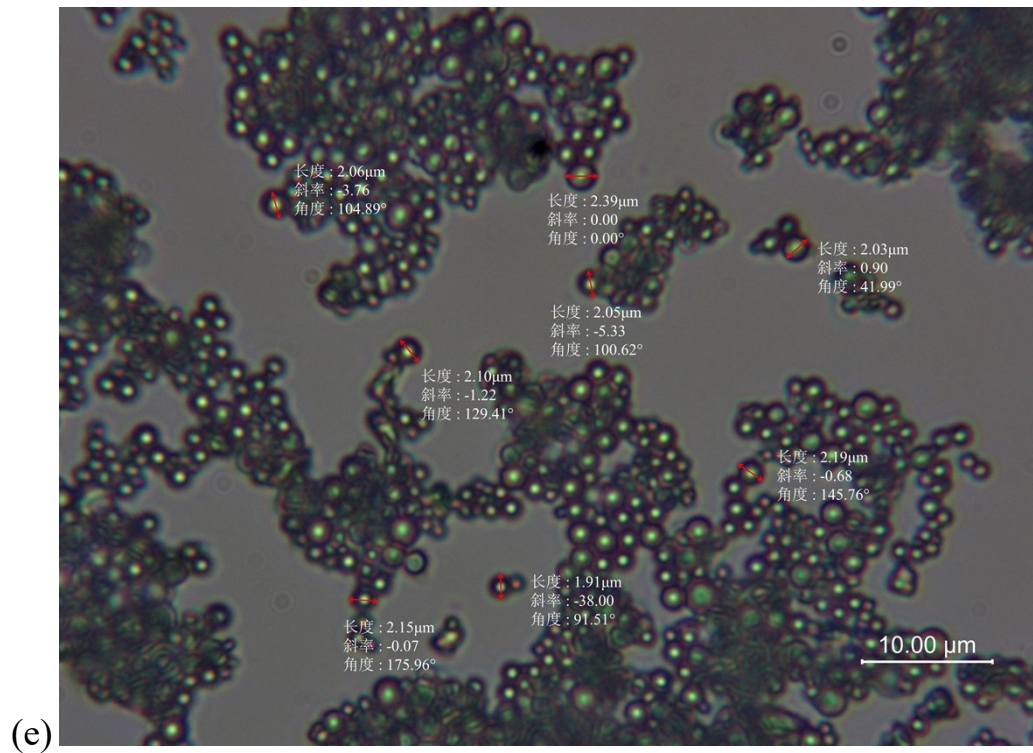

Figure S2 Morphologies of (a)  $\text{Er}_2\text{O}_3$ , (b)  $\text{Y}_2\text{O}_3$ , (c)  $\sim 10\mu\text{m}$  borosilicate glass (BSG\_10), (d)  $\sim 5\mu\text{m}$  borosilicate glass (BSG\_5), and (e)  $\sim 2\mu\text{m}$  borosilicate glass (BSG\_2) particles

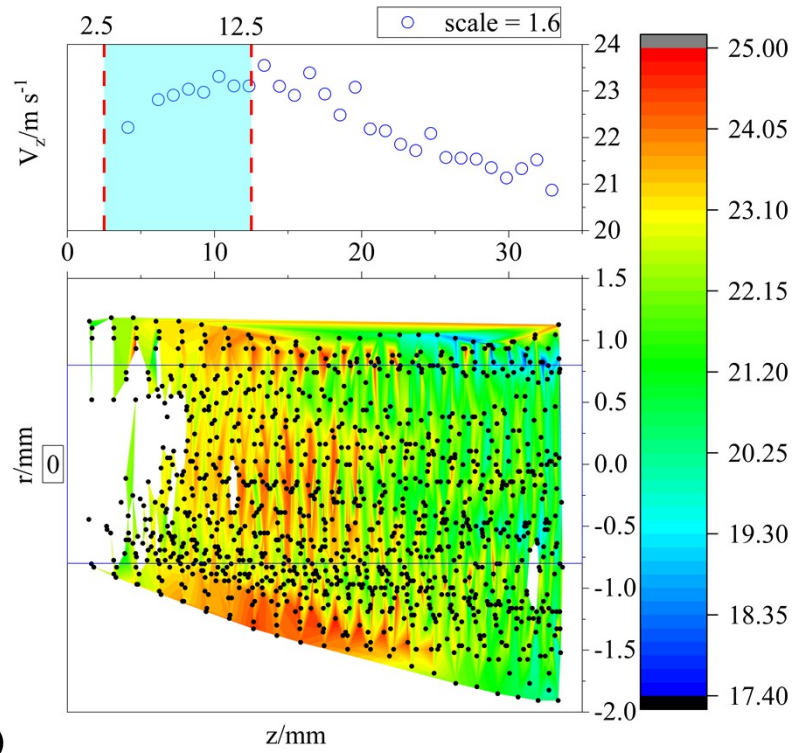

(a)

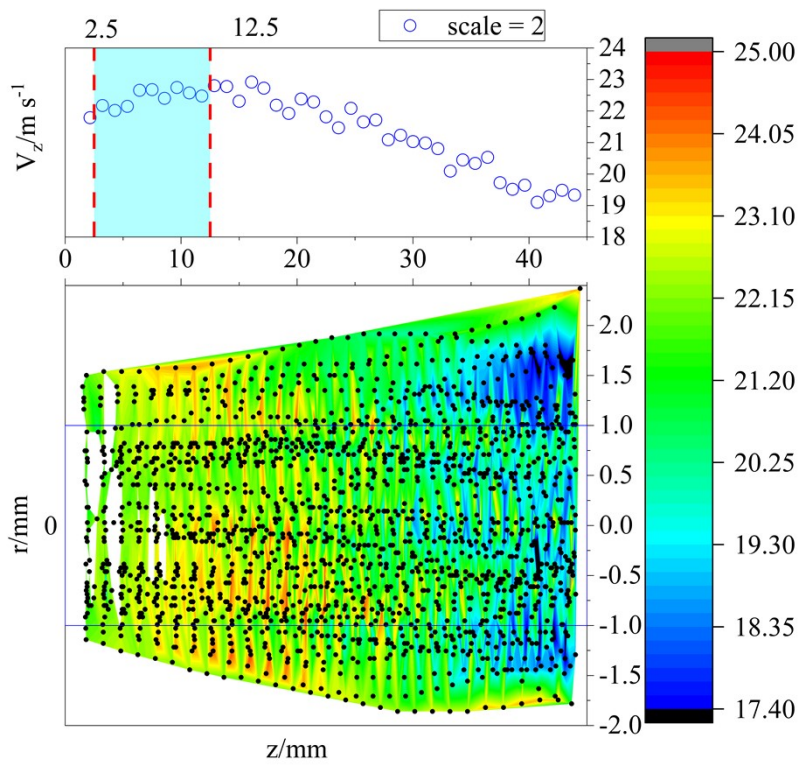

(b)

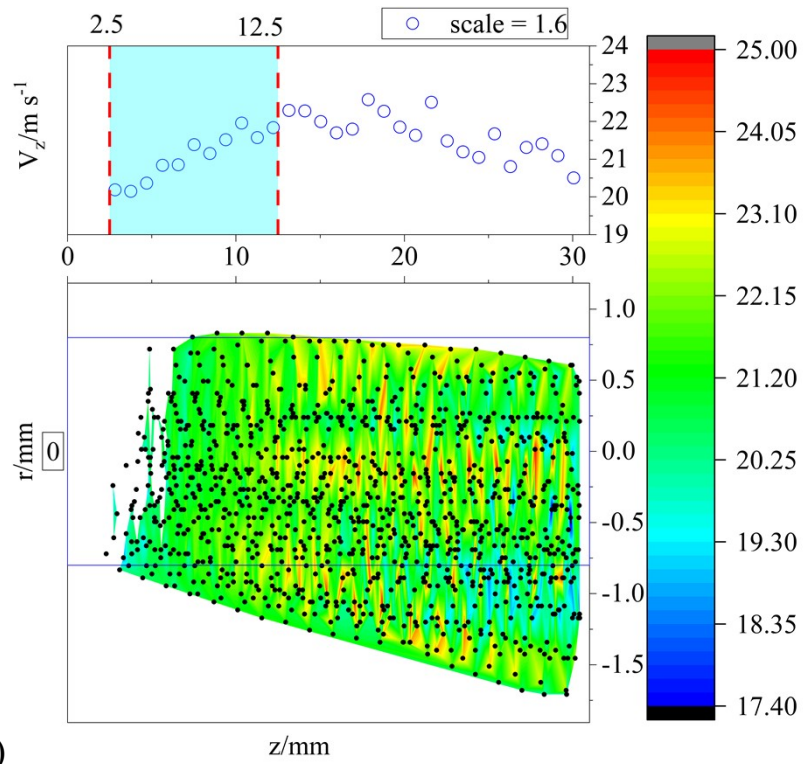

(c)

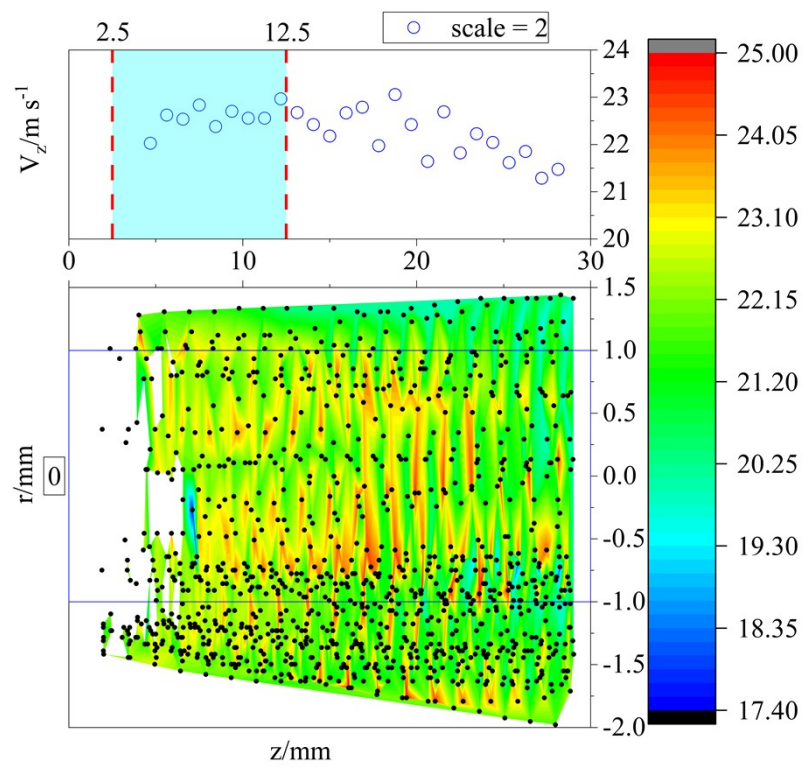

(d)

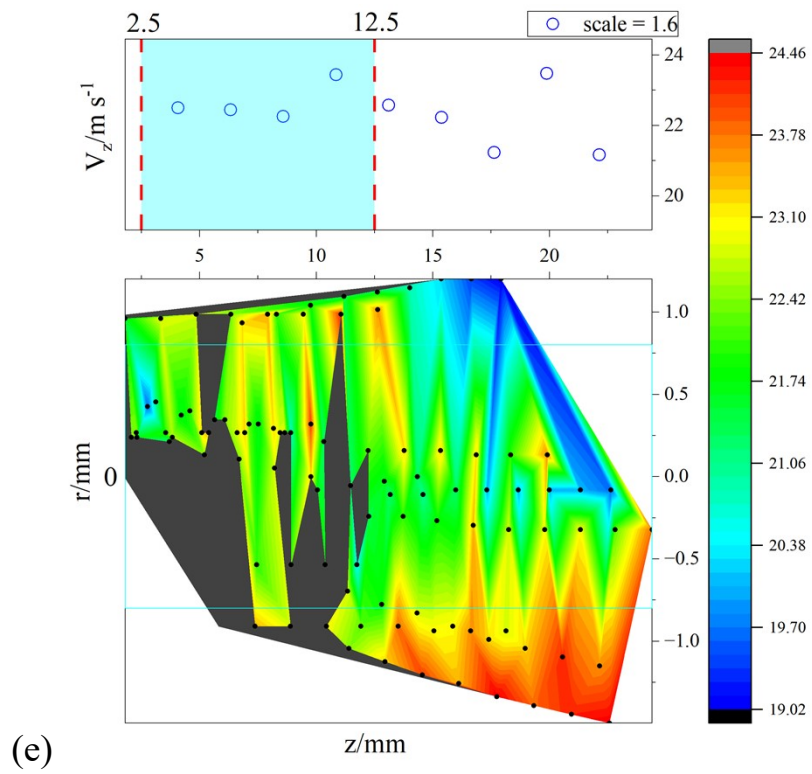

Figure S3 Contour maps and interpolated profiles of axial velocity for  $\text{Er}_2\text{O}_3$  (a),  $\text{Y}_2\text{O}_3$  (b), BSG\_10 (c), BSG\_5 (d) and BSG\_2 (e) particle in pure Ar-ICP

**Data supporting Figure 4 The radial profiles of gray value at three axis positions ( $z=2.5, 5.0$  and  $7.5$  mm) in pure argon ICP (a) and mixed-gas ICPs with addition of 10%O<sub>2</sub> (b), 20%O<sub>2</sub> (c), 2%N<sub>2</sub> (d), 4%N<sub>2</sub> (e), 6%N<sub>2</sub> (f) in the sample gas**

01 Gray value\_pure Ar.txt

02 Gray value\_10% O2.txt

03 Gray value\_20% O2.txt

04 Gray value\_2% N2.txt

05 Gray value\_4% N2.txt

06 Gray value\_6% N2.txt

**Data supporting Figure 5 The axial velocity of ion clouds originating from Er<sub>2</sub>O<sub>3</sub> (a), Y<sub>2</sub>O<sub>3</sub> (b), BSG\_10 (c), BSG\_5 (d) and BSG\_2 (e) particles in the pure argon ICP**

07 The axial velocity of Er<sub>2</sub>O<sub>3</sub>, Y<sub>2</sub>O<sub>3</sub>, BSG\_10, BSG\_5 and BSG\_2.txt

**Data supporting Figure 6 The experimental data (a) and cubic polynomial fitting (b) of the axial flow velocity distribution in the central channel of the pure Ar-ICP**

08 Comparison of V<sub>z</sub> of Y<sub>2</sub>O<sub>3</sub>, Er<sub>2</sub>O<sub>3</sub>, BSG\_5 and Er<sub>2</sub>O<sub>3</sub> in Han 2025.txt

**Data supporting Figure 7 The axial flow velocity distribution in the central channel (a) and the plateau value (b) under varying r.f. powers for pure Ar-ICP. r.f. power setting: 900, 1000, 1100, 1200 and 1300 W.**

09 The Vz profiles at 900, 1000, 1100, 1200 and 1300W.txt

10 The plateau value of Vz at varying r.f. power.txt

**Data supporting Figure 8 The axial flow velocity distribution in the central channel under sample flow rates of 1.2 (a), 1.0 (b), 0.8 (c), 0.6 (d) and 0.4 (e) L/min for pure Ar-ICP**

11 The Vz profiles at sample flow rates of 1.2, 1.0, 0.8, 0.6 and 0.4L min<sup>-1</sup>.txt

**Data supporting Figure 9 The axial flow velocity distribution in the central channel of Ar-O<sub>2</sub> ICP (a) and Ar-N<sub>2</sub> ICP (b)**

12 The Vz profiles at 0%, 10% and 20%O<sub>2</sub>.txt

13 The Vz profiles at 0%, 2%, 4% and 6%N<sub>2</sub>.txt
